# Supplementary material for: Comparison of Sequential Three-Drug Regimens as Initial Therapy for HIV-1 Infection
Source: Atypon-hosted journal article supplement (doi:10.1056/nejmoa030264), 2003-12-10

# Supplementary Appendix

This appendix has been provided by the authors to give readers additional information about their work.

Supplement to: Robbins GK, De Gruttola V, Shafer RW, et al. Comparison of Sequential Three-Drug Regimens as Initial Therapy for HIV-1 Infection. *N Engl J Med* 2003;349:2293-303.

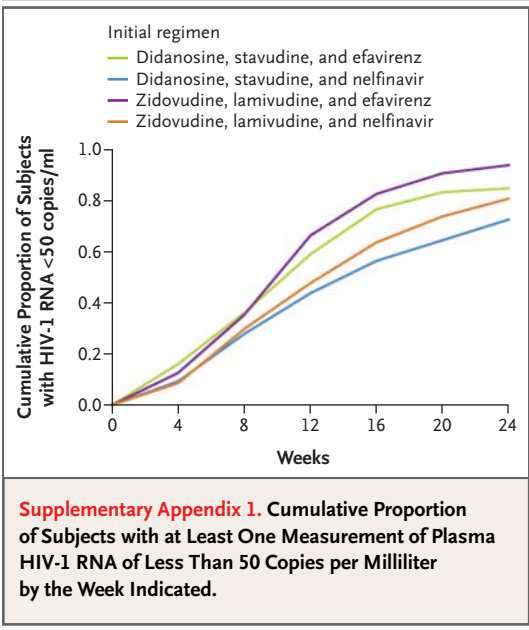

Supplement: nejm_robbins_2293sa1.pdf [file nejm_robbins_2293sa1.pdf]
